# Supplementary material for: Doping and heterojunction strategies for constructing V-doped Ni3FeN/Ni anchored on N-doped graphene tubes as an efficient overall water splitting electrocatalyst
Source: Royal Society of Chemistry journal article supplement (doi:10.1039/d2ta03143d), 2022-01-01
Supplement: d2ta03143d1.pdf [file d2ta03143d1.pdf]

## Supplementary Material

# Doping and Heterojunction Strategies for Constructing V-doped Ni<sub>3</sub>FeN/Ni Anchored on N-doped Graphene Tubes as Efficient Overall Water Splitting Electrocatalyst

Guanying Song<sup>a</sup>, Siqi Luo<sup>a</sup>, Qing Zhou<sup>a</sup>, Jiachen Zou<sup>a</sup>, Yusheng Lin<sup>a</sup>, Lei Wang<sup>b</sup>, Guicun Li<sup>a</sup>,  
Alan Meng<sup>\*b</sup> Zhenjiang Li<sup>\*a</sup>

*<sup>a</sup>College of Electromechanical Engineering, College of Materials Science and Engineering,  
Qingdao University of Science and Technology, Qingdao 266061, P. R. China.*

*<sup>b</sup>Key Laboratory of Optic-electric Sensing and Analytical Chemistry for Life Science, MOE,  
College of Chemistry and Molecular Engineering, Qingdao University of Science and Technology,  
Qingdao 266042, Shandong, P. R. China.*

\* Corresponding author. Tel.: +86 532 88959506; fax: +86 532 88959506.

E-mail address: [alanmengqust@163.com](mailto:alanmengqust@163.com) (A. L. Meng);

[zhenjiangli@qust.edu.cn](mailto:zhenjiangli@qust.edu.cn) (Z. J. Li)

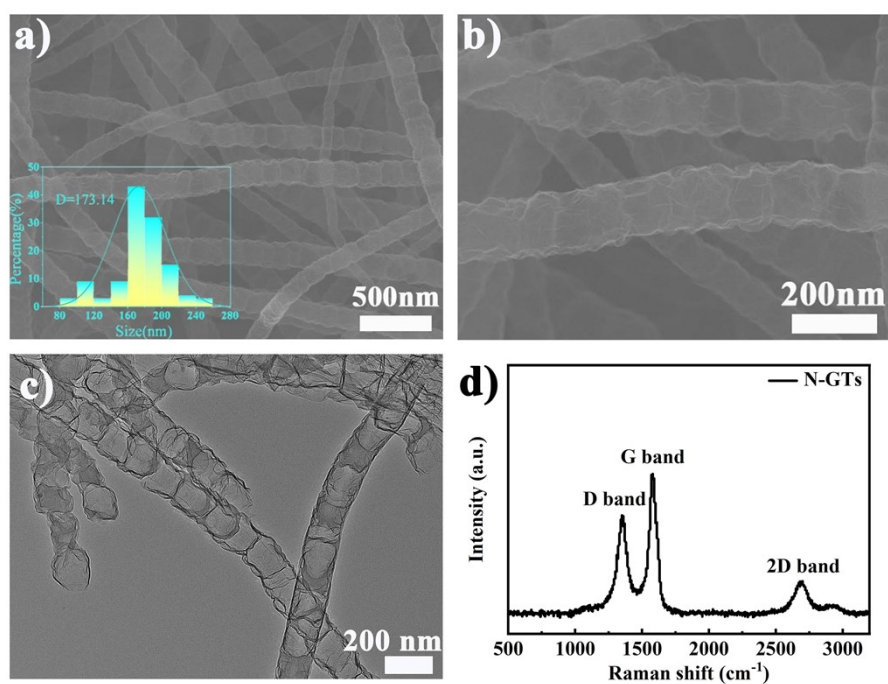

**Fig. S1.** (a, b) SEM image, (the inset in (a) is the diameter distribution of the N-GTs), (c) TEM image, (d) Raman spectra of self-synthesized N-GTs.

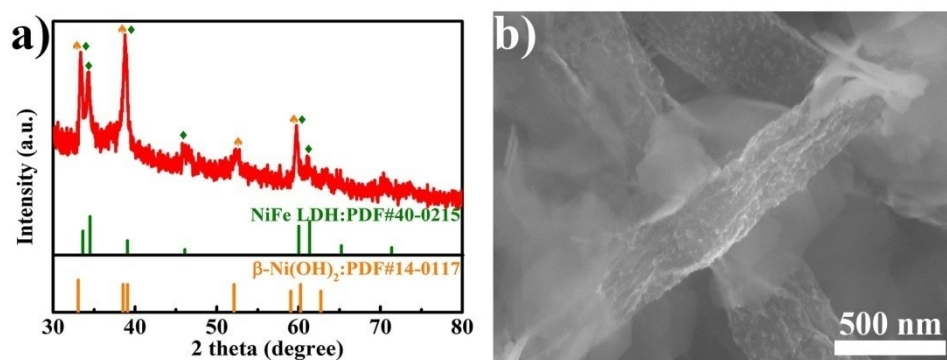

**Fig. S2.** (a) XRD pattern, (b) SEM image of V-doping Ni-Fe precursor prepared by hydrothermal method.

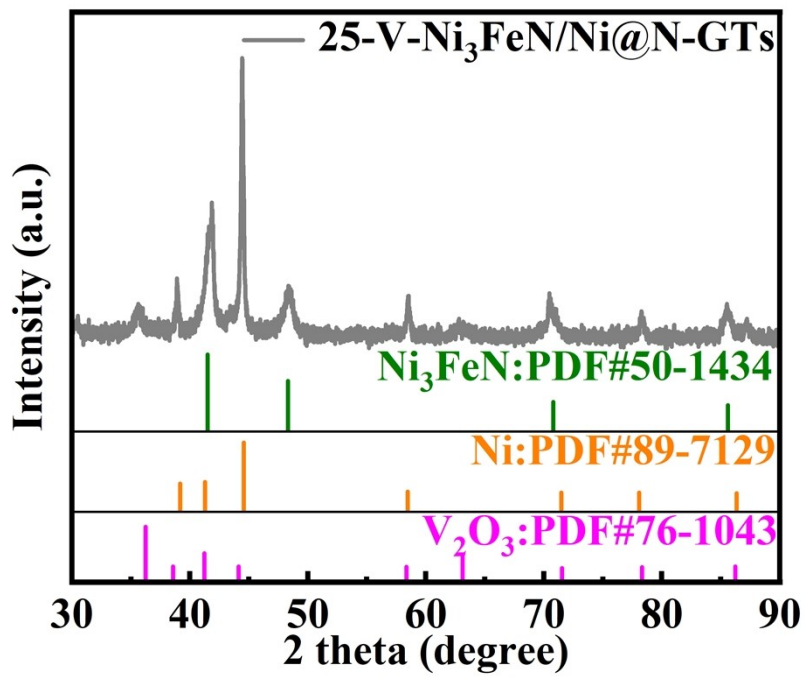

Fig. S3. XRD of 25-V-Ni<sub>3</sub>FeN/Ni@N-GTs.

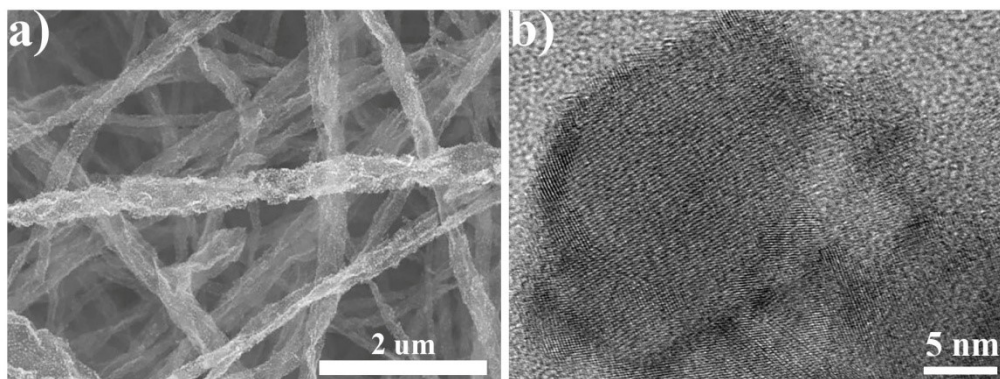

Fig. S4. (a) SEM image, (b) HRTEM image of V-Ni<sub>3</sub>FeN/Ni@N-GTs.

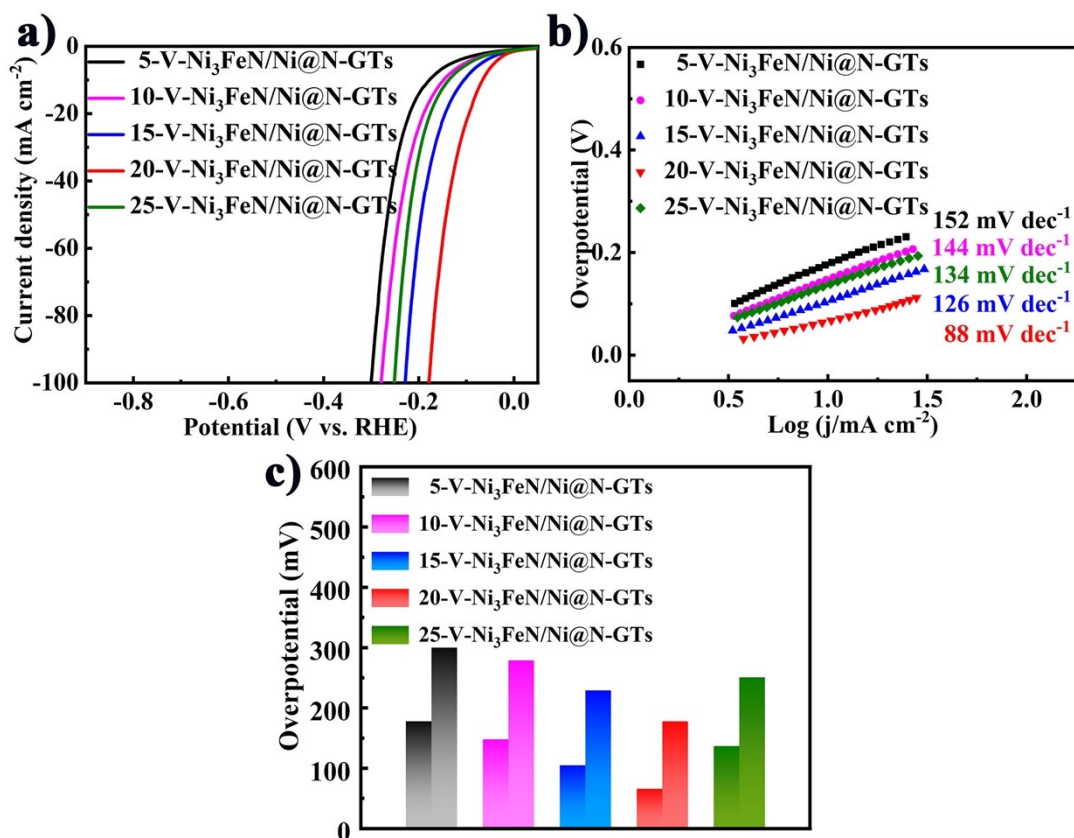

**Fig. S5. Electrocatalysis of the HER in alkaline media: a) LSV curves b) Corresponding overpotentials at the current density of 10 mA cm<sup>-2</sup> and 100 mA cm<sup>-2</sup> c) Tafel plots of 5-V-Ni<sub>3</sub>FeN/Ni@N-GTs, 10-V-Ni<sub>3</sub>FeN/Ni@N-GTs, 15-V-Ni<sub>3</sub>FeN/Ni@N-GTs, 20-V-Ni<sub>3</sub>FeN/Ni@N-GTs and 25-V-Ni<sub>3</sub>FeN/Ni@N-GTs.**

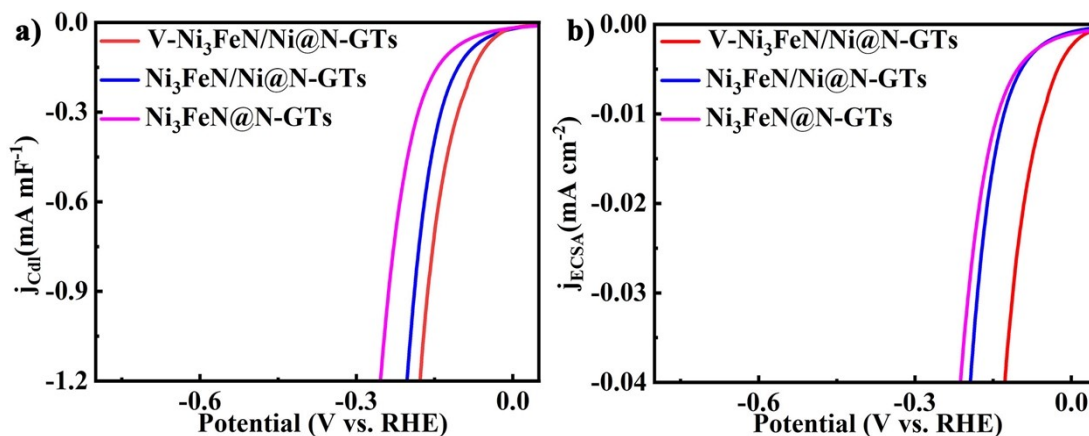

**Fig. S6. LSV curves of HER normalized by (a) the electrochemical double-layer capacitance  $C_{dl}$  and (b) the electrochemical active surface area (ECSA).**

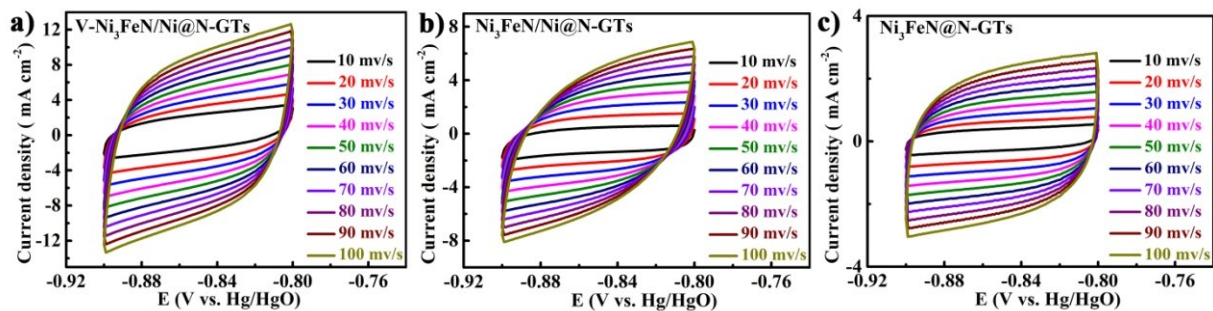

**Fig. S7.** CVs performed at various scan rates in the region of -0.90 V to -0.8 V (vs. Hg/HgO) for (a) V-Ni<sub>3</sub>FeN/Ni @N-GTs, (b) Ni<sub>3</sub>FeN/Ni@N-GTs, (c) Ni<sub>3</sub>FeN@N-GTs.

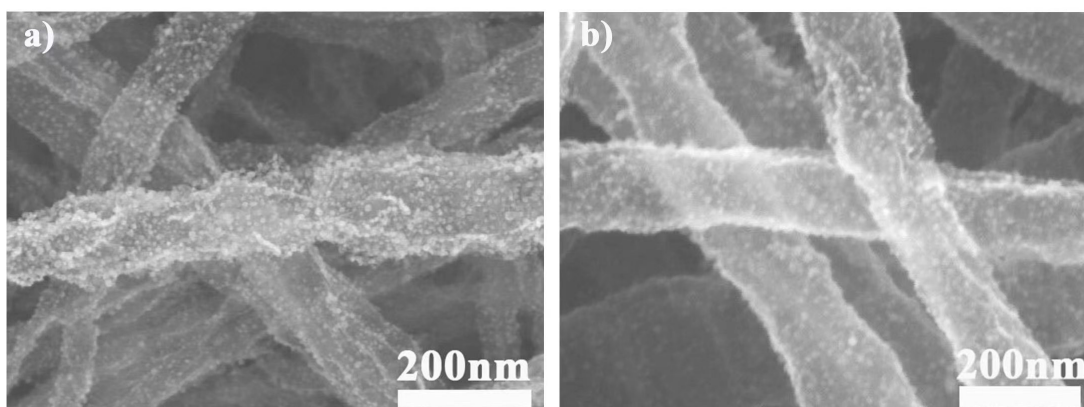

**Fig. S8.** SEM images of the V-Ni<sub>3</sub>FeN/Ni@N-GTs before (a) and after (b) HER stability testing.

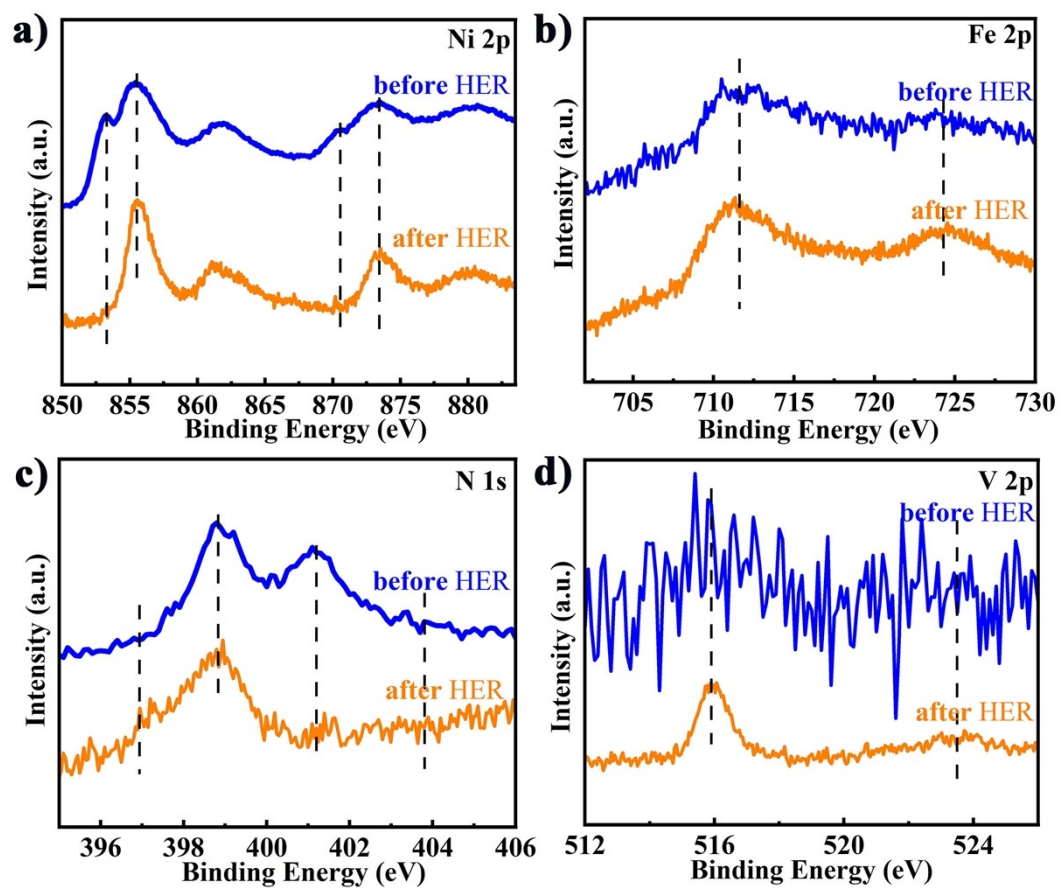

Fig. S9. The XPS spectra of V-Ni<sub>3</sub>FeN/Ni@N-GTs before and after HER test.

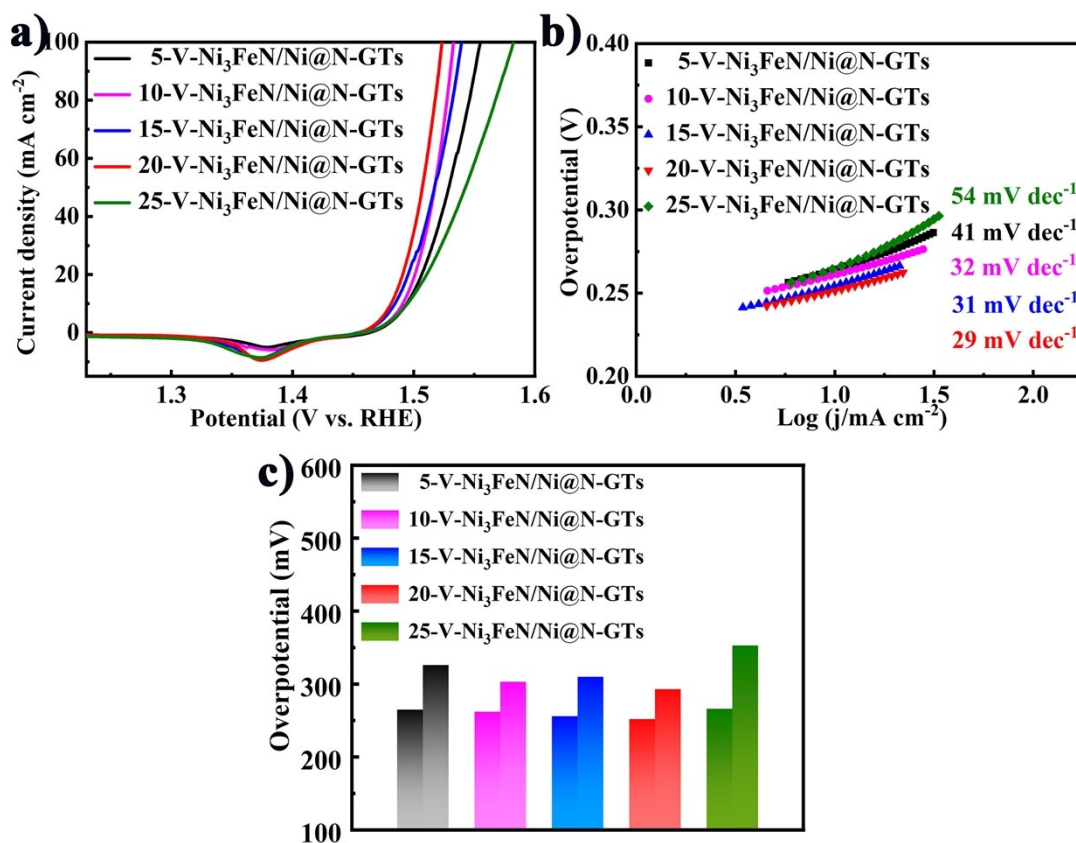

**Fig. S10.** Electrocatalysis of the OER in alkaline media: a) LSV curves b) Corresponding overpotentials at the current density of 10 mA cm<sup>-2</sup> and 100 mA cm<sup>-2</sup> c) Tafel plots of 5-V-Ni<sub>3</sub>FeN/Ni@N-GTs, 10-V-Ni<sub>3</sub>FeN/Ni@N-GTs, 15-V-Ni<sub>3</sub>FeN/Ni@N-GTs, 20-V-Ni<sub>3</sub>FeN/Ni@N-GTs and 25-V-Ni<sub>3</sub>FeN/Ni@N-GTs.

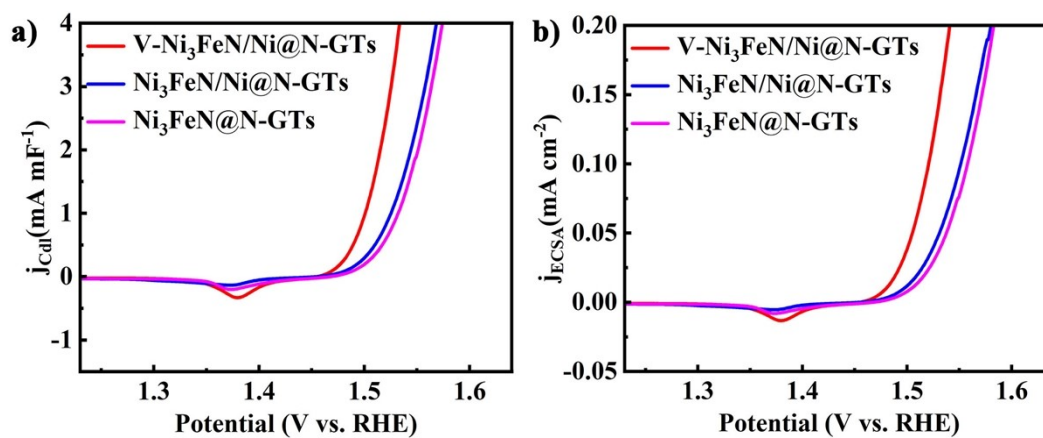

**Fig. S11.** LSV curves of OER normalized by a) the electrochemical double-layer capacitance C<sub>dl</sub> and b) the electrochemical active surface area ECSA.

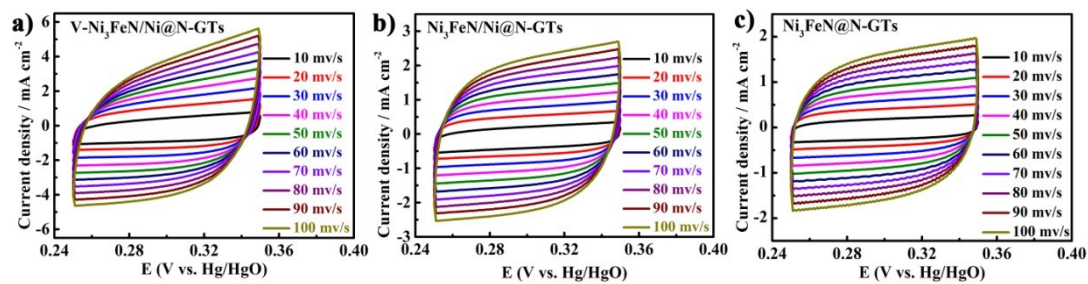

**Fig. S12.** CVs performed at various scan rates in the region of 0.25 V to 0.35 V (vs. Hg/HgO) for (a) V-Ni<sub>3</sub>FeN/Ni@N-GTs, (b) Ni<sub>3</sub>FeN/Ni@N-GTs, (c) Ni<sub>3</sub>FeN@N-GTs.

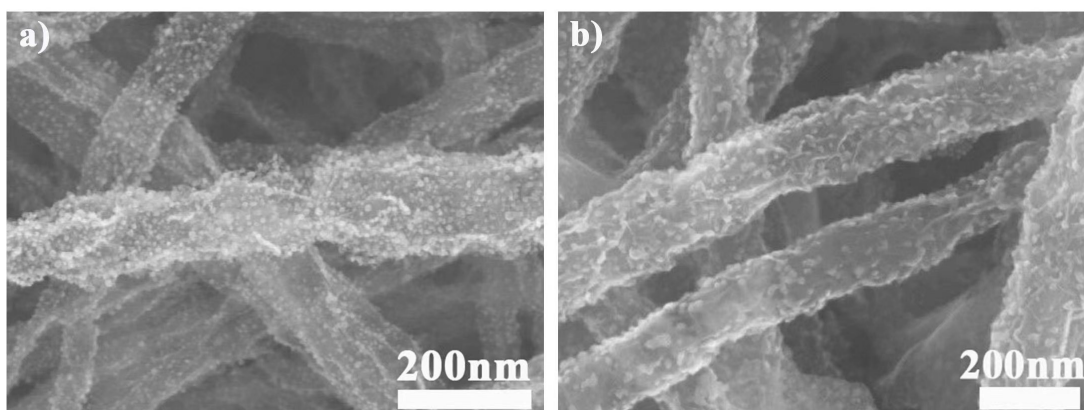

**Fig. S13.** SEM images of the V-Ni<sub>3</sub>FeN/Ni@N-GTs before (a) and after (b) OER stability testing.



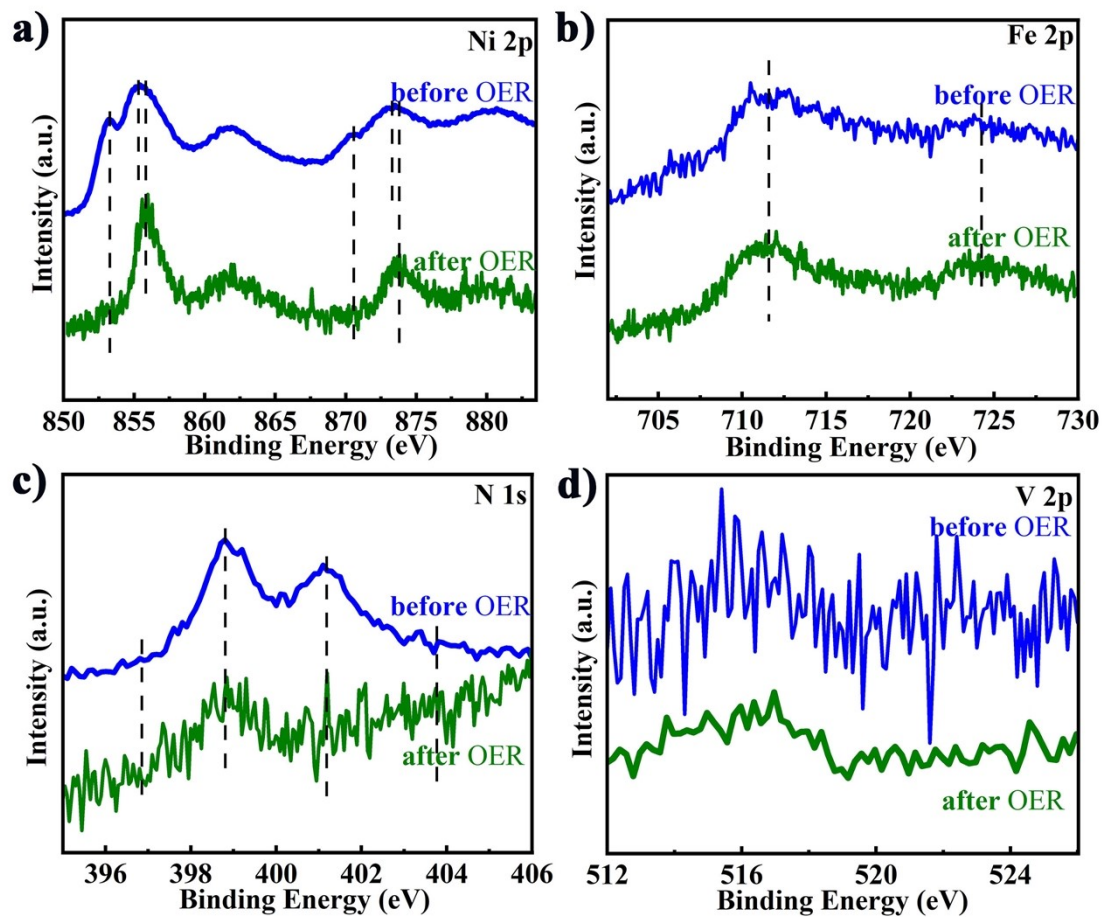

Fig. S14. The XPS spectra of V-Ni<sub>3</sub>FeN/Ni@N-GTs before and after OER test.

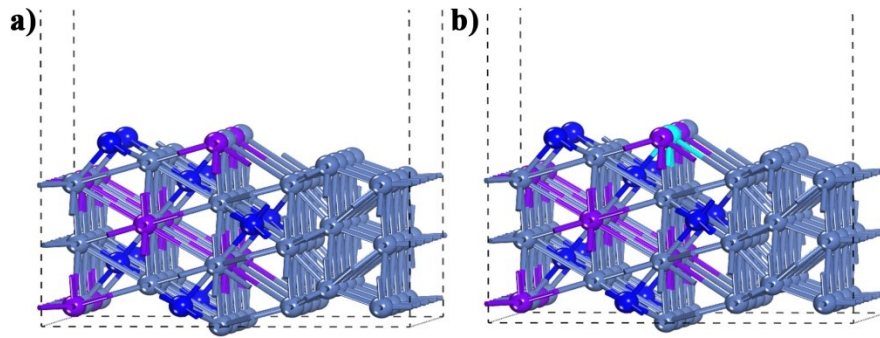

**Fig. S15.** The optimized model structure diagram of (a) Ni<sub>3</sub>FeN/Ni and (b) V-Ni<sub>3</sub>FeN/Ni.

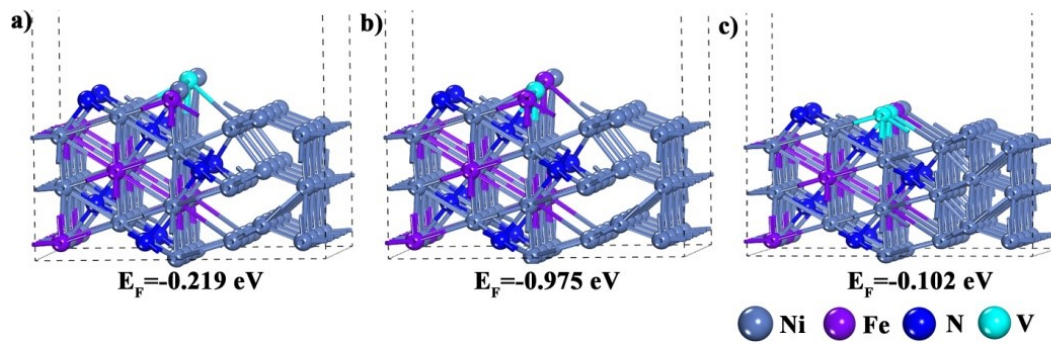

**Fig. S16.** Structures and formation energies ( $E_{\text{tot}}$ ) of (a) V substitute Fe, (b) V substitute Ni, (c) V substitute Fe and Ni in the V-Ni<sub>3</sub>FeN/Ni material.

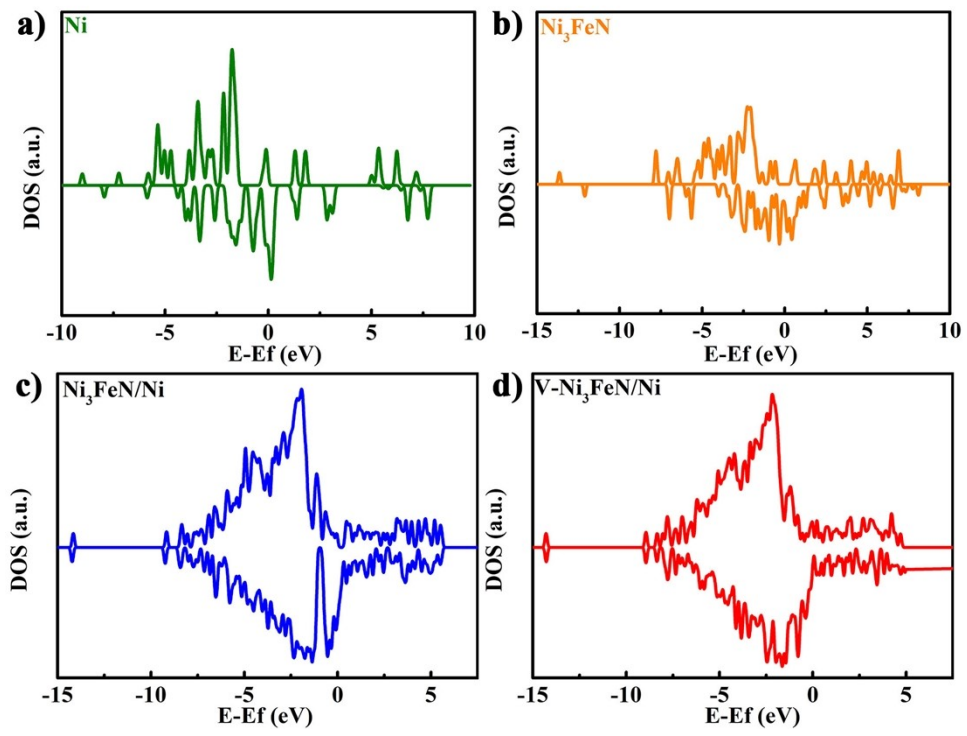

**Fig. S17.** Density of states on (a) Ni, (b) Ni<sub>3</sub>FeN, (c) Ni<sub>3</sub>FeN/Ni and (d) V-Ni<sub>3</sub>FeN/Ni.

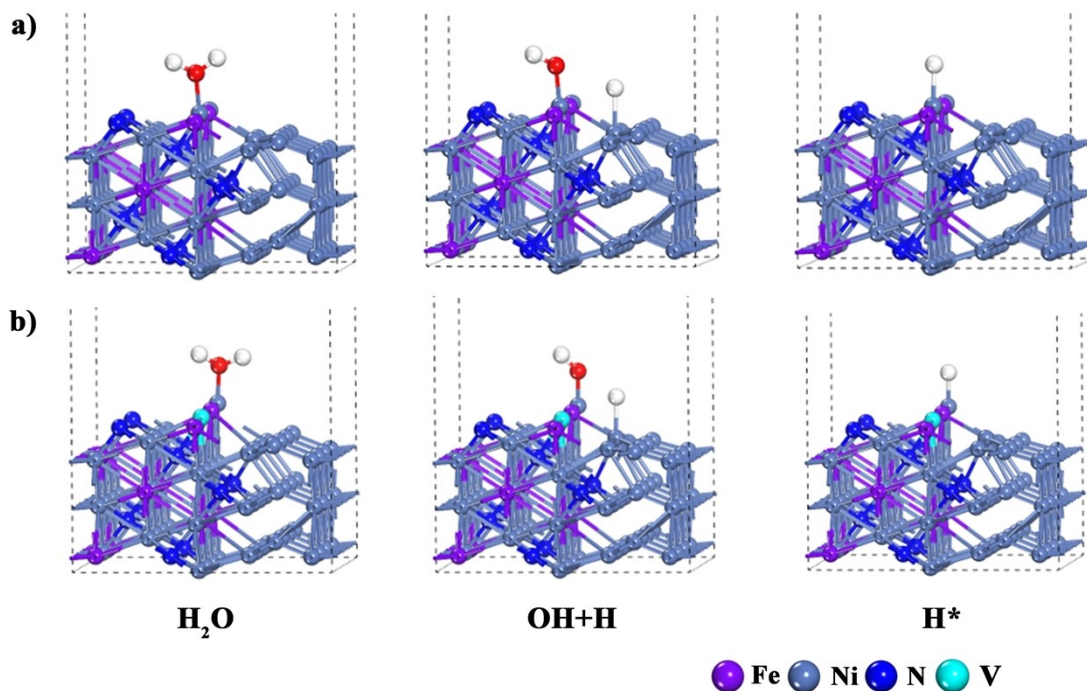

Fig. S18. Side view of schematic structural representations for water dissociation and hydrogen adsorption at Ni site in the pristine  $\text{Ni}_3\text{FeN}/\text{Ni}$  (a) and  $\text{V-Ni}_3\text{FeN}/\text{Ni}$  (b).

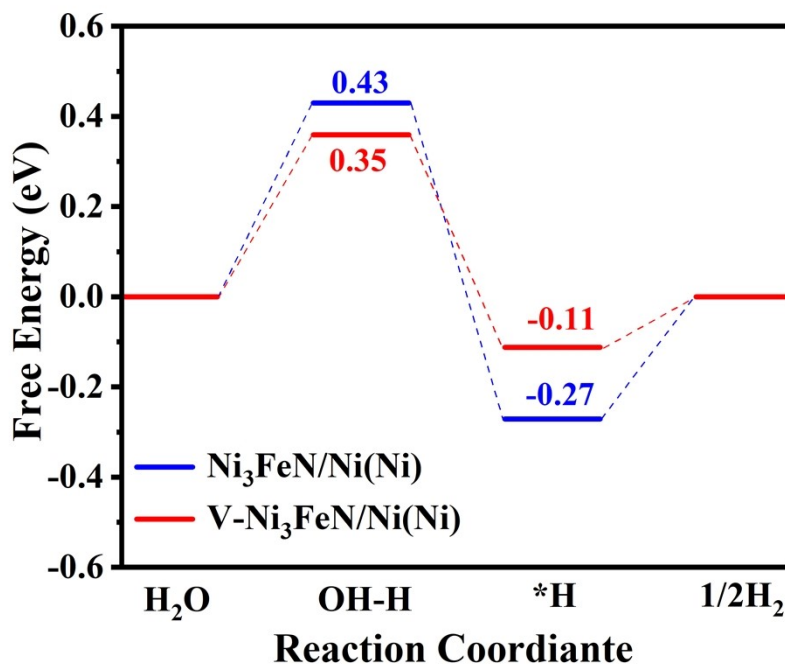

Fig. S19. Free energy diagrams for alkaline HER on  $\text{V-Ni}_3\text{FeN}/\text{Ni}@N\text{-GTs}$  and  $\text{Ni}_3\text{FeN}/\text{Ni}@N\text{-GTs}$ .

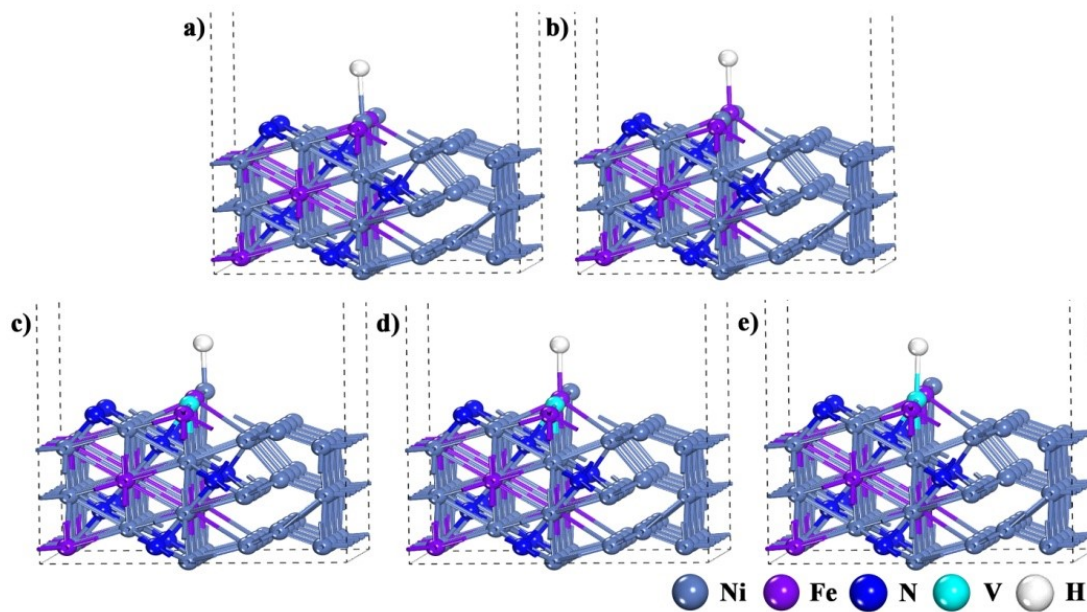

**Fig. S20** Side view of schematic structural representations for hydrogen adsorption at Ni and Fe sites in the pristine Ni<sub>3</sub>FeN/Ni (a-b); Side view of schematic structural representations for hydrogen adsorption at Ni, Fe and V sites in V-Ni<sub>3</sub>FeN/Ni (c-e).

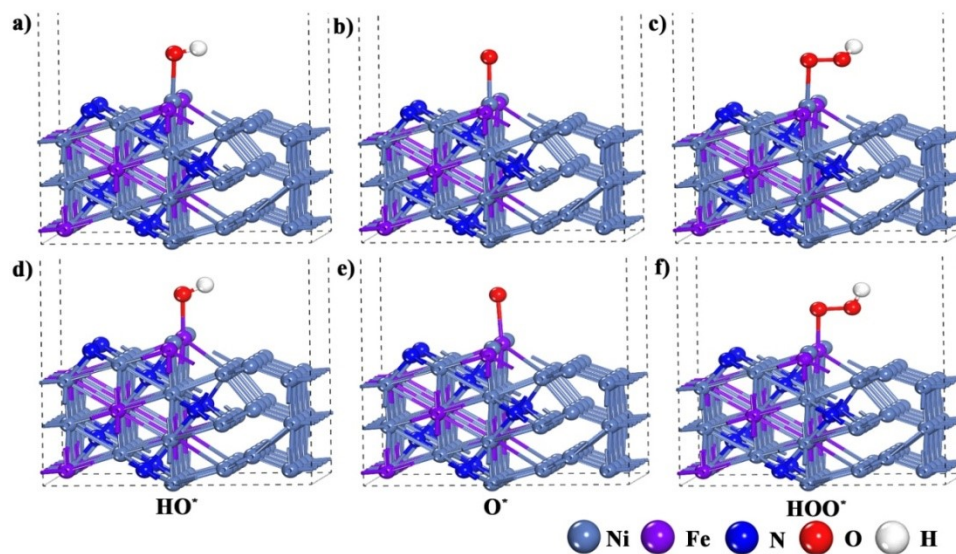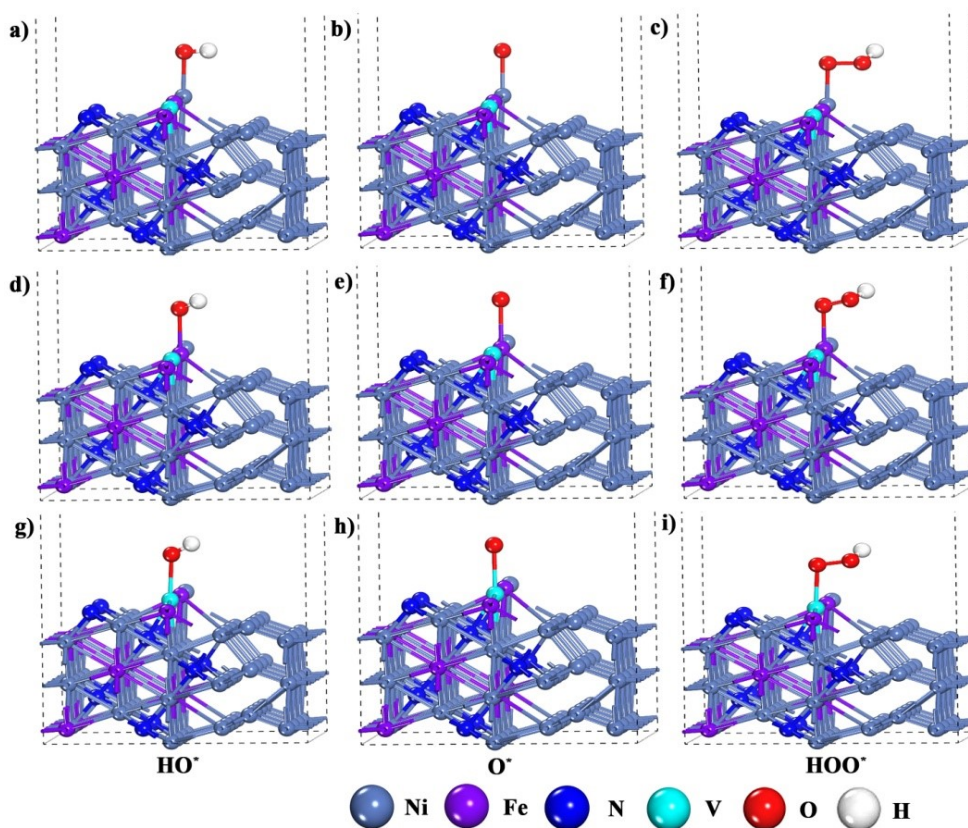

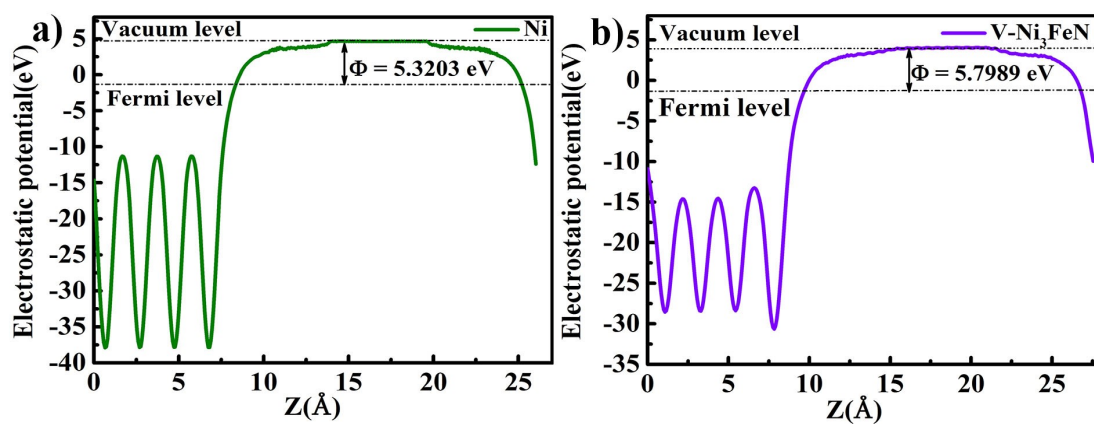

**Fig. S23.** The work function values of (a) Ni and (b) V-Ni<sub>3</sub>FeN.

**Tab. S1. HER performance of different catalysts in alkaline solution (1M KOH).**

| Catalyst                                                                          | Overpotential / mV<br>(10 mA cm <sup>-2</sup> ) | Tafel slop<br>(mV dec <sup>-1</sup> ) | Electrolyte | Ref       |
|-----------------------------------------------------------------------------------|-------------------------------------------------|---------------------------------------|-------------|-----------|
| V-Ni <sub>3</sub> FeN/Ni@N-GTs                                                    | 66                                              | 88                                    | 1.0 M KOH   | This work |
| NiCo                                                                              | 86                                              | 62.1                                  | 1.0 M KOH   | [1]       |
| Ni <sub>3</sub> S <sub>2</sub> @NGCLs/NF                                          | 134                                             | 84                                    | 1.0 M KOH   | [2]       |
| Ni <sub>2</sub> P-Ni <sub>12</sub> P <sub>5</sub>                                 | 76                                              | 68                                    | 1.0 M KOH   | [3]       |
| d-Ni <sub>3</sub> FeN/Ni <sub>3</sub> Fe                                          | 125                                             | 98                                    | 1.0 M KOH   | [4]       |
| CoNi <sub>2</sub> S <sub>4</sub> /WS <sub>2</sub> /Co <sub>9</sub> S <sub>8</sub> | 70                                              | 112                                   | 1.0 M KOH   | [5]       |
| Fe-Ni <sub>5</sub> P <sub>4</sub> /NiFeOH                                         | 197                                             | 94                                    | 1.0 M KOH   | [6]       |
| Mo-NiCo <sub>2</sub> O <sub>4</sub> /Co <sub>5.47</sub> N/NF                      | 81                                              | 116.7                                 | 1.0 M KOH   | [7]       |
| CoO <sub>x</sub> /CoN <sub>y</sub> @CN <sub>z</sub>                               | 261                                             | 84                                    | 1.0 M KOH   | [8]       |
| Ni <sub>2</sub> P/Ni <sub>3</sub> S <sub>2</sub>                                  | 79                                              | 50.4                                  | 1.0 M KOH   | [9]       |
| Ni@NC6-600                                                                        | 181                                             | 119                                   | 1.0 M KOH   | [10]      |



**Tab. S2.OER performance of different catalysts in alkaline solution (1M KOH).**

| Catalyst                                                         | Overpotential / mV<br>(10 mA cm <sup>-2</sup> ) | Tafel slop<br>(mV dec <sup>-1</sup> ) | Electrolyte | Ref       |
|------------------------------------------------------------------|-------------------------------------------------|---------------------------------------|-------------|-----------|
| V-Ni <sub>3</sub> FeN/Ni@N-GTs                                   | 252                                             | 29                                    | 1.0 M KOH   | This work |
| Ni <sub>3</sub> S <sub>2</sub> @NGCLs/NF                         | 271                                             | 99                                    | 1.0 M KOH   | [2]       |
| NiCo <sub>2</sub> O <sub>4</sub> @CoS/NF                         | 290                                             | 92                                    | 0.1 M KOH   | [11]      |
| NiCoFe-MOF-74                                                    | 273                                             | 63                                    | 0.1 M KOH   | [12]      |
| NiCoPO/NC                                                        | 300                                             | 94                                    | 1.0 M KOH   | [13]      |
| CoNS/C                                                           | 345                                             | 83.3                                  | 1.0 M KOH   | [14]      |
| NiMoNS                                                           | 260                                             | 54.7                                  | 1.0 M KOH   | [15]      |
| Ni/NiFe <sub>2</sub> O <sub>4</sub> -CNTs                        | 284                                             | 46.3                                  | 1.0 M KOH   | [16]      |
| Fe@BIF-73-NS                                                     | 291                                             | 37.9                                  | 1.0 M KOH   | [17]      |
| V-NiCo <sub>2</sub> O <sub>4</sub>                               | 340                                             | 71.9                                  | 1.0 M KOH   | [18]      |
| (Co <sub>1-x</sub> Fe <sub>x</sub> ) <sub>9</sub> S <sub>8</sub> | 268                                             | 63.9                                  | 1.0 M KOH   | [19]      |

**Tab. S3. Overall water splitting performance of different catalysts in alkaline solution (1 M KOH).**

| Catalyst                                                                                                                                | Overpotential /<br>mV<br>(10 mA cm <sup>-2</sup> ) | Electrolyte  | Ref          |
|-----------------------------------------------------------------------------------------------------------------------------------------|----------------------------------------------------|--------------|--------------|
| V-Ni <sub>3</sub> FeN/Ni@N-GTs  V-Ni <sub>3</sub> FeN/Ni@N-GTs                                                                          | 1.55                                               | 1.0 M<br>KOH | This<br>work |
| CdS@Co <sub>9</sub> S <sub>8</sub> /Ni <sub>3</sub> S <sub>2</sub>   CdS@Co <sub>9</sub> S <sub>8</sub> /Ni <sub>3</sub> S <sub>2</sub> | 1.56                                               | 1.0 M<br>KOH | [20]         |
| NiFe-LDH/Ni(OH) <sub>2</sub>   NiFe-LDH/Ni(OH) <sub>2</sub>                                                                             | 1.60                                               | 1.0 M<br>KOH | [21]         |
| Mo-NiCo <sub>2</sub> O <sub>4</sub> /Co <sub>5.47</sub> N/NF  Mo-NiCo <sub>2</sub> O <sub>4</sub> /Co <sub>5.47</sub> N/NF              | 1.56                                               | 1.0 M<br>KOH | [7]          |
| CoO <sub>x</sub> /CoN <sub>y</sub> @CN <sub>z</sub>   CoO <sub>x</sub> /CoN <sub>y</sub> @CN <sub>z</sub>                               | 1.57                                               | 1.0 M<br>KOH | [8]          |
| NiCo <sub>2</sub> O <sub>4</sub> @NiS    NiCo <sub>2</sub> O <sub>4</sub> @NiS                                                          | 1.65                                               | 1.0 M<br>KOH | [22]         |
| d-Ni <sub>3</sub> FeN/Ni <sub>3</sub> Fe  d-Ni <sub>3</sub> FeN/Ni <sub>3</sub> Fe                                                      | 1.61                                               | 1.0 M<br>KOH | [4]          |
| Ni <sub>3</sub> S <sub>2</sub> /Cu-NiCo LDH/NF   Ni <sub>3</sub> S <sub>2</sub> /Cu-NiCo<br>LDH/NF                                      | 1.58                                               | 1.0 M<br>KOH | [23]         |
| FeCoP <sub>2</sub> @NPPC  FeCoP <sub>2</sub> @NPPC                                                                                      | 1.6                                                | 1.0 M<br>KOH | [24]         |
| P-Fe <sub>3</sub> N@NC NSs/IF  P-Fe <sub>3</sub> N@NC NSs/IF                                                                            | 1.61                                               | 1.0 M<br>KOH | [25]         |
| NiFeOP  NiFeOP                                                                                                                          | 1.57                                               | 1.0 M<br>KOH | [26]         |

## References

- [1] J. Zhou, L. Yu, Q. Zhou, C. Huang, Y. Zhang, B. Yu, Y. Yu, Ultrafast fabrication of porous transition metal foams for efficient electrocatalytic water splitting, *Appl. Catal. B: Environ.* 288 (2021) 120002.
- [2] B. Li, Z. Li, Q. Pang, J. Zhang, Core/shell cable-like Ni<sub>3</sub>S<sub>2</sub> nanowires/N-doped graphene-like carbon layers as composite electrocatalyst for overall electrocatalytic water splitting, *Chem. Eng. J.* 401 (2020) 126045.
- [3] Z. Wang, S. Wang, L. Ma, Y. Guo, J. Sun, N. Zhang, R. Jiang, Water-Induced Formation of Ni<sub>2</sub>P–Ni<sub>12</sub>P<sub>5</sub> Interfaces with Superior Electrocatalytic Activity toward Hydrogen Evolution Reaction, *Small.* 17 (2021) 2006770.
- [4] Z. Li, H. Jang, D. Qin, X. Jiang, X. Ji, M.G. Kim, L. Zhang, X. Liu, J. Cho, Alloy-strain-output induced lattice dislocation in Ni<sub>3</sub>FeN/Ni<sub>3</sub>Fe ultrathin nanosheets for highly efficient overall water splitting, *J. Mater. Chem. A.* 9 (2021) 4036-4043.
- [5] M. Ma, J. Xu, H. Wang, X. Zhang, S. Hu, W. Zhou, H. Liu, Multi-interfacial engineering of hierarchical CoNi<sub>2</sub>S<sub>4</sub>/WS<sub>2</sub>/Co<sub>9</sub>S<sub>8</sub> hybrid frameworks for robust all-pH electrocatalytic hydrogen evolution, *Appl. Catal. B: Environ.* 297 (2021) 120455.
- [6] C. Li, J. Zhao, L. Xie, J. Wu, G. Li, Fe doping and oxygen vacancy modulated Fe-Ni<sub>5</sub>P<sub>4</sub>/NiFeOH nanosheets as bifunctional electrocatalysts for efficient overall water splitting, *Appl. Catal. B: Environ.* 291 (2021) 119987.
- [7] W. Liu, L. Yu, R. Yin, X. Xu, J. Feng, X. Jiang, D. Zheng, X. Gao, X. Gao, W. Que, P. Ruan, F. Wu, W. Shi, X. Cao, Non-3d Metal Modulation of a 2D Ni–Co Heterostructure Array as Multifunctional Electrocatalyst for Portable Overall Water Splitting, *Small.* 16 (2020) 1906775.
- [8] J. Liu, C. Wang, H. Sun, H. Wang, F. Rong, L. He, Y. Lou, S. Zhang, Z. Zhang, M. Du, CoO<sub>x</sub>/CoN<sub>y</sub> nanoparticles encapsulated carbon-nitride nanosheets as an efficiently trifunctional electrocatalyst for overall water splitting and Zn-air battery, *Appl. Catal. B: Environ.* 279 (2020) 119407.

- [9] H. Su, S. Song, S. Li, Y. Gao, L. Ge, W. Song, T. Ma, J. Liu, High-valent bimetal Ni<sub>3</sub>S<sub>2</sub>/Co<sub>3</sub>S<sub>4</sub> induced by Cu doping for bifunctional electrocatalytic water splitting, *Appl. Catal. B: Environ.* 293 (2021) 120225.
- [10] N. Cheng, N. Wang, L. Ren, G. Casillas-Garcia, N. Liu, Y. Liu, X. Xu, W. Hao, S.X. Dou, Y. Du, In-situ grafting of N-doped carbon nanotubes with Ni encapsulation onto MOF-derived hierarchical hybrids for efficient electrocatalytic hydrogen evolution, *Carbon.* 163 (2020) 178-185.
- [11] S. Adhikari, Y. Kwon, D.-H. Kim, Three-dimensional core-shell structured NiCo<sub>2</sub>O<sub>4</sub>@CoS/Ni-Foam electrocatalyst for oxygen evolution reaction and electrocatalytic oxidation of urea, *Chem. Eng. J.* 402 (2020) 126192.
- [12] H. Zheng, Y. Wang, P. Zhang, F. Ma, P. Gao, W. Guo, H. Qin, X. Liu, H. Xiao, Multiple effects driven by AC magnetic field for enhanced electrocatalytic oxygen evolution in alkaline electrolyte, *Chem. Eng. J.* 426 (2021) 130785.
- [13] C. Wang, W. Chen, D. Yuan, S. Qian, D. Cai, J. Jiang, S. Zhang, Tailoring the nanostructure and electronic configuration of metal phosphides for efficient electrocatalytic oxygen evolution reactions, *Nano Energy.* 69 (2020) 104453.
- [14] Y. Wang, S. Zhang, X. Meng, T. Wang, Y. Feng, W. Zhang, Y. He, Y. Huang, N. Yang, Z.-F. Ma, Surface Tuning to Promote the Electrocatalysis for Oxygen Evolution Reaction: From Metal-Free to Cobalt-Based Carbon Electrocatalysts, *ACS Appl. Mater. Interfaces.* 13 (2021) 503-513.
- [15] Y. Liu, P. Liu, Y. Men, Y. Li, C. Peng, S. Xi, Y. Pan, Incorporating MoO<sub>3</sub> Patches into a Ni Oxyhydroxide Nanosheet Boosts the Electrocatalytic Oxygen Evolution Reaction, *ACS Appl. Mater. Interfaces.* 13 (2021) 26064-26073.
- [16] X. Yu, G. Chen, Y. Wang, J. Liu, K. Pei, Y. Zhao, W. You, L. Wang, J. Zhang, L. Xing, Hierarchical coupling effect in hollow Ni/NiFe<sub>2</sub>O<sub>4</sub>-CNTs microsphere via spray-drying for enhanced oxygen evolution electrocatalysis, *Nano Res.* 13 (2020) 437-446.

- [17] T. Wen, M. Liu, S. Chen, Q. Li, Y. Du, T. Zhou, C. Ritchie, J. Zhang, 2D Boron Imidazolate Framework Nanosheets with Electrocatalytic Applications for Oxygen Evolution and Carbon Dioxide Reduction Reaction, *Small*. 16 (2020) 1907669.
- [18] X. Wang, Y. Zhou, J. Luo, F. Sun, J. Zhang, Synthesis of V-doped urchin-like  $\text{NiCo}_2\text{O}_4$  with rich oxygen vacancies for electrocatalytic oxygen evolution reactions, *Electrochim. Acta*. 406 (2022) 139800.
- [19] Y. Wang, Z. Meng, X. Gong, C. Jiang, C. Zhang, J. Xu, Y. Li, J. Bao, Y. Cui, H. Wang, Y. Zeng, X. Hu, S. Yu, H. Tian, Enhancing stability of  $\text{Co}_9\text{S}_8$  by iron incorporation for oxygen evolution reaction and supercapacitor electrodes, *Chem. Eng. J.* 431 (2022) 133980.
- [20] F. Si, C. Tang, Q. Gao, F. Peng, S. Zhang, Y. Fang, S.J.J.o.M.C.A. Yang, Bifunctional  $\text{CdS}@ \text{Co}_9\text{S}_8/\text{Ni}_3\text{S}_2$  catalyst for efficient electrocatalytic and photo-assisted electrocatalytic overall water splitting, *J. Mater. Chem. A*. 8 (2020) 3083-3096.
- [21] N. Gultom, H. Abdullah, C. Hsu, D. Kuo, Activating nickel iron layer double hydroxide for alkaline hydrogen evolution reaction and overall water splitting by electrodepositing nickel hydroxide, *Chem. Eng. J.* 419 (2021) 129608.
- [22] L. Feng, W. Lu, J. Liu, D. Li, L. Hu, C. Xu, Guarding active sites and electron transfer engineering of core-shell nanosheet as robust bifunctional applications for overall water splitting and capacitors, *Electrochim. Acta*. 331 (2020) 135372.
- [23] L. Jia, G. Du, D. Han, Y. Hao, W. Zhao, Y. Fan, Q. Su, S. Ding, B. Xu,  $\text{Ni}_3\text{S}_2/\text{Cu-NiCo}$  LDH heterostructure nanosheet arrays on Ni foam for electrocatalytic overall water splitting, *J. Mater. Chem. A*. 9 (2021) 27639-27650.
- [24] Y. Wang, Z. Yang, D. Yang, L. Zhao, X. Shi, G. Yang, B. Han,  $\text{FeCoP}_2$  Nanoparticles Embedded in N and P Co-doped Hierarchically Porous Carbon for Efficient Electrocatalytic Water Splitting, *ACS Appl. Mater.*

**Interfaces. 13 (2021) 8832-8843.**

- [25] **G. Li, J. Yu, W. Yu, L. Yang, X. Zhang, X. Liu, H. Liu, W. Zhou, Phosphorus-Doped Iron Nitride Nanoparticles Encapsulated by Nitrogen-Doped Carbon Nanosheets on Iron Foam In Situ Derived from *Saccharomyces Cerevisiae* for Electrocatalytic Overall Water Splitting, *Small*. 16 (2020) 2001980.**
- [26] **Y. Xie, B. Zhao, K. Tang, W. Qin, C. Tan, J. Yao, Y. Li, L. Jiang, X. Wang, Y. Sun, In-situ phase transition induced nanoheterostructure for overall water splitting, *Chem. Eng. J.* 409 (2021) 128156.**
